# Rare and common vertebrates span a wide spectrum of population trends

Gergana N. Daskalova<sup>1\*</sup>, Isla H. Myers-Smith<sup>1</sup> and John L. Godlee<sup>1</sup>

**Submission type:** Article

Author affiliation:

1. School of GeoSciences, University of Edinburgh, Edinburgh EH9 3FF, UK

[gndaskalova@gmail.com](mailto:gndaskalova@gmail.com)

[johngodlee@gmail.com](mailto:johngodlee@gmail.com)

[isla.myers-smith@ed.ac.uk](mailto:isla.myers-smith@ed.ac.uk)

\* Corresponding author:

Gergana N. Daskalova

[gndaskalova@gmail.com](mailto:gndaskalova@gmail.com)

Crew Building, King's Buildings

Edinburgh EH9 1UU Scotland

Tel: +44 7946274522

**Keywords:** population change, rarity, commonness, vertebrates, geographic range, habitat

specificity, population size, Living Planet Database, GBIF, IUCN

Main text word count: 5282

Methods word count: 4286

Figures: 4

Supplementary Information Figures: 19

Supplementary Information Tables: 8

## Abstract

The Earth's biota is changing over time in complex ways. A critical challenge is to test whether specific biomes, taxa or types of species benefit or suffer in a time of accelerating global change. We analysed nearly 10 000 abundance time series from over 2000 vertebrate species part of the Living Planet Database. We integrated abundance data with information on geographic range, habitat preference, taxonomic and phylogenetic relationships, and IUCN Red List Categories and threats. We found that 15% of populations declined, 18% increased, and 67% showed no net changes over time. Against a backdrop of no biogeographic and phylogenetic patterning in population change, we uncovered a distinct taxonomic signal. Amphibians were the only taxa that experienced net declines in the analysed data, while birds, mammals and reptiles experienced net increases. Population trends were poorly captured by species' rarity and global-scale threats. Incorporation of the full spectrum of population change will improve conservation efforts to protect global biodiversity.

## Main text

Ecosystem-level change is currently unfolding all around the globe and modifying the abundances of the different species forming Earth's biota. As global change continues to accelerate<sup>1,2</sup>, there is a growing need for comprehensive assessments of the factors explaining the variation in ecological changes observed across taxa and biomes<sup>3</sup>. However, existing empirical studies of the predictors of the abundance of individuals of different species (hereafter, population change) mostly focus on either specific taxa<sup>4</sup> or on population declines alone<sup>2,5</sup>. A critical research challenge is to disentangle the sources of heterogeneity across the full spectrum of population change for available population data. Recent compilations of long-term population time series, extensive occurrence, phylogenetic, habitat preference and IUCN Red List Category data<sup>6-8</sup> provide a unique opportunity to test which species- and population-level attributes explain variation in population trends and fluctuations among the world's well-monitored vertebrate species. Population change is the underlying process leading to community reassembly<sup>9</sup> and the resulting changes to biodiversity are vitally important for ecosystem functions and services<sup>10</sup>.

The distributions of global change drivers such as land-use change, habitat change, pollution, invasion by non-native species and climate change show distinct clustering across space<sup>11-13</sup>. Spatial clustering has also been documented for biodiversity trends derived from assemblage time series, with the marine realm emerging as a hotspot for rapid changes in community composition<sup>14</sup>. Since assemblages are made up of populations, the biogeographic patterns at the assemblage level suggest similar clustering might occur at the population level as well<sup>15</sup>. In addition to geographic patterns in exposure to anthropogenic activities, species' vulnerability can also influence population abundance over time<sup>16</sup>. Species traits can moderate population responses to natural and anthropogenic environmental change<sup>16</sup>, and across evolutionary time,

certain clades have been more vulnerable to declines and extinctions<sup>6–8</sup>. Building on known variability in species' vulnerability<sup>16–18</sup>, we expected taxonomic and phylogenetic signals in population trends and fluctuations (e.g. greater declines, increases or fluctuations in abundance for specific taxa and among specific clades). Understanding which biomes, taxa and types of species are experiencing the most acute changes in abundance over time could provide key insights for conservation prioritization.

Conservation efforts often focus on protecting rare species - those with restricted geographic extents, small population sizes or high habitat specificity - as they are assumed to be more likely to decline and ultimately go extinct<sup>19–21</sup>. Species with a smaller geographic range might have more concentrated exposure to environmental change, with less opportunities to find refugia or disperse, thus increasing the likelihood of declines<sup>1,9</sup>. As per population dynamics theory<sup>22,23</sup> and Taylor's power law<sup>24</sup>, species with small populations are more likely to undergo stochastic fluctuations that could lead to pronounced declines, local extinction and eventually global species extinction<sup>5</sup>. Small populations are also more likely to decline due to inbreeding, but note that there are also instances of naturally small and stable populations<sup>25,26</sup>. Allee effects, the relationship between individual fitness and population density, further increase the likelihood of declines due to lack of potential mates and low reproductive output once populations reach a critically low density<sup>27,28</sup>. Furthermore, environmental change might have disproportionately large effects on the populations of species with high habitat specificity, as for these species persistence and colonization of new areas are limited by strict habitat preferences<sup>1,29</sup>. The fossil record indicates that on millennial time scales, rare species are more likely to decline and ultimately go extinct<sup>30</sup>, but human actions have pushed Earth away from traditional geological trajectories<sup>31</sup>, and the relationships between rarity and population change across the planet have yet to be tested across the Anthropocene.



On a global scale, species are exposed to a variety of threats, among which habitat change, resource exploitation and hunting dominate as key predictors of extinction risk<sup>32</sup>. Species' IUCN Red List Categories are often used in conservation prioritisation and more threatened species tend to be the focus of conservation initiatives<sup>33</sup>. At more local scales, there might be variation in how populations are changing over time in different locations, in isolation from their overall conservation status<sup>4,34</sup>. Testing population change across species' IUCN Red List Category allows us to link contemporary changes in abundance with long-term probability of extinction<sup>35</sup>. Determining how local-scale population trends vary across species' IUCN Red List Categories has practical applications for assessing species' recovery which is useful for the proposed IUCN Green List of Species<sup>36</sup>.

Here, we asked how the trends and fluctuations of vertebrate populations vary with biogeography, taxa, phylogenetic relationships and across species' rarity metrics and IUCN Red List Categories and threat types from the species' IUCN Red List profiles. We tested the following predictions: 1) There will be biogeographic patterns in population trends and fluctuations across the planet's realms and biomes, in line with particular regions of the world experiencing high rates of environmental change (e.g., tropical forests<sup>37</sup>). 2) Populations of rare species will be more likely to decline and fluctuate than the populations of common species. 3) Populations of species with a higher number of threats are more likely to decline and fluctuate than the populations of least concern species and those exposed to a lower number of threats. We quantified differences in population trends and fluctuations across latitudes and biomes within the freshwater, marine and terrestrial realms to test the presence of distinct hotspots of declines and increases. Additionally, we used data from the VertLife and BirdLife Databases<sup>6-8</sup> to assess taxonomic and phylogenetic signals, in the patterns of population change to determine if specific groups experience

pronounced changes over time. We investigated whether the heterogeneity in population change globally is explained by differences in species' rarity and IUCN Red List Categories. We measured rarity using three separate metrics – geographic range derived from GBIF records, mean population size (number of individuals that were recorded during monitoring for each population in the Living Planet Database) and habitat specificity derived from the species' IUCN Red List profiles. In a *post-hoc* analysis, we compiled threat types and number of threats derived from the species' IUCN Red List profiles to determine how threats influence local-scale population change. Using the largest currently available compilation of population records over time, we conducted a global synthesis of population trends and fluctuations to provide key empirical evidence for the management, conservation and prediction of ecological changes across the Anthropocene.

We analysed 9286 vertebrate population time series from 2084 species part of the Living Planet Database (133 092 records) over the period between 1970 and 2014. These time series represent repeated monitoring surveys of the number of individuals in a given area (species' abundance over time), hereafter called "populations". We focus on two aspects of population change – overall changes in abundance over time (population trend,  $\mu$ ) and abundance variability over time (population fluctuations,  $\sigma^2$ ). In the first stage of our analyses, we quantified trends and fluctuations for each population using state-space models that account for observation error and random fluctuations<sup>38</sup> (Figure S1). In the second stage, we modelled the population trend and fluctuation estimates from the first stage across latitude, realm, biome, taxa, rarity metrics, phylogenetic relatedness, species' IUCN Red List Category and threat type using a Bayesian modelling framework (Figure S2). We included a species random intercept effect to account for the possible correlation between the trends of populations from the same species (see table Table S1 for sample sizes). As sensitivity analyses, we additionally used variance weighting of the population trend estimates ( $\mu$ ) by the observation/measurement error around them ( $\tau^2$ ) and

population trend estimates from linear model fits (slopes instead of  $\mu$ ) as the input variables in the second stage models, as well as several different fluctuations estimates. We also repeated our analyses on a single-country scale, using only populations within the United Kingdom, where monitoring efforts are particularly rigorous and extensive. All different analytical approaches yielded very similar results and are described in further detail in the methods.

## Results

We found a broad spectrum of population trends across vertebrate populations within the Living Planet Database. Across the time series we analysed, 15% (1381 time series) of populations were declining, 18% (1656 time series) were increasing, and 67% (6249 time series) showed no net changes in abundance over time, in contrast to a null distribution derived from randomised data (Figure S6b). Trends were considered statistically different from no net change when the confidence intervals around the population trend estimates did not overlap zero. Our results were similar when we weighted population trends by the state-space model derived observation error (Figures 1-4 and Tables S2-3).

## Biogeographic patterns of population trends and fluctuations

We found that globally, population increases, declines and fluctuations over time occurred across all latitudes and biomes within the freshwater, marine and terrestrial realms, with no strong biogeographic patterning and no specific hotspots of population declines (Figure 1, Table S2). Across realms, monitored vertebrate populations experienced net population increases (freshwater slope = 0.005, CI = 0.002 to 0.01; marine slope = 0.004, CI = 0.002 to 0.01; terrestrial slope = 0.003, CI = 0.001 to 0.005, Figure 1d-e). In the freshwater and terrestrial realms, there was a bimodal distribution of population trends, driven largely by terrestrial bird species showing small increases and decreases over time (Hartigans' dip test,  $D = 0.04$ ,  $p < 0.01$ ). Across biomes,

populations in Mediterranean forests, montane grasslands, polar freshwaters, temperate wetlands, tropical forests and tropical coral biomes were more likely to increase, whereas populations from the remaining studied biomes experienced no net changes (Figure 1h, Table S2). Population fluctuations were less pronounced in the terrestrial realm (slope = 0.02, CI = 0.018 to 0.021, Figure 1f-g), but those populations were also monitored for the longest duration across systems (average duration – 28 years for terrestrial, 18 years for marine and 21 years for freshwater populations, Figure S1, Table S2).

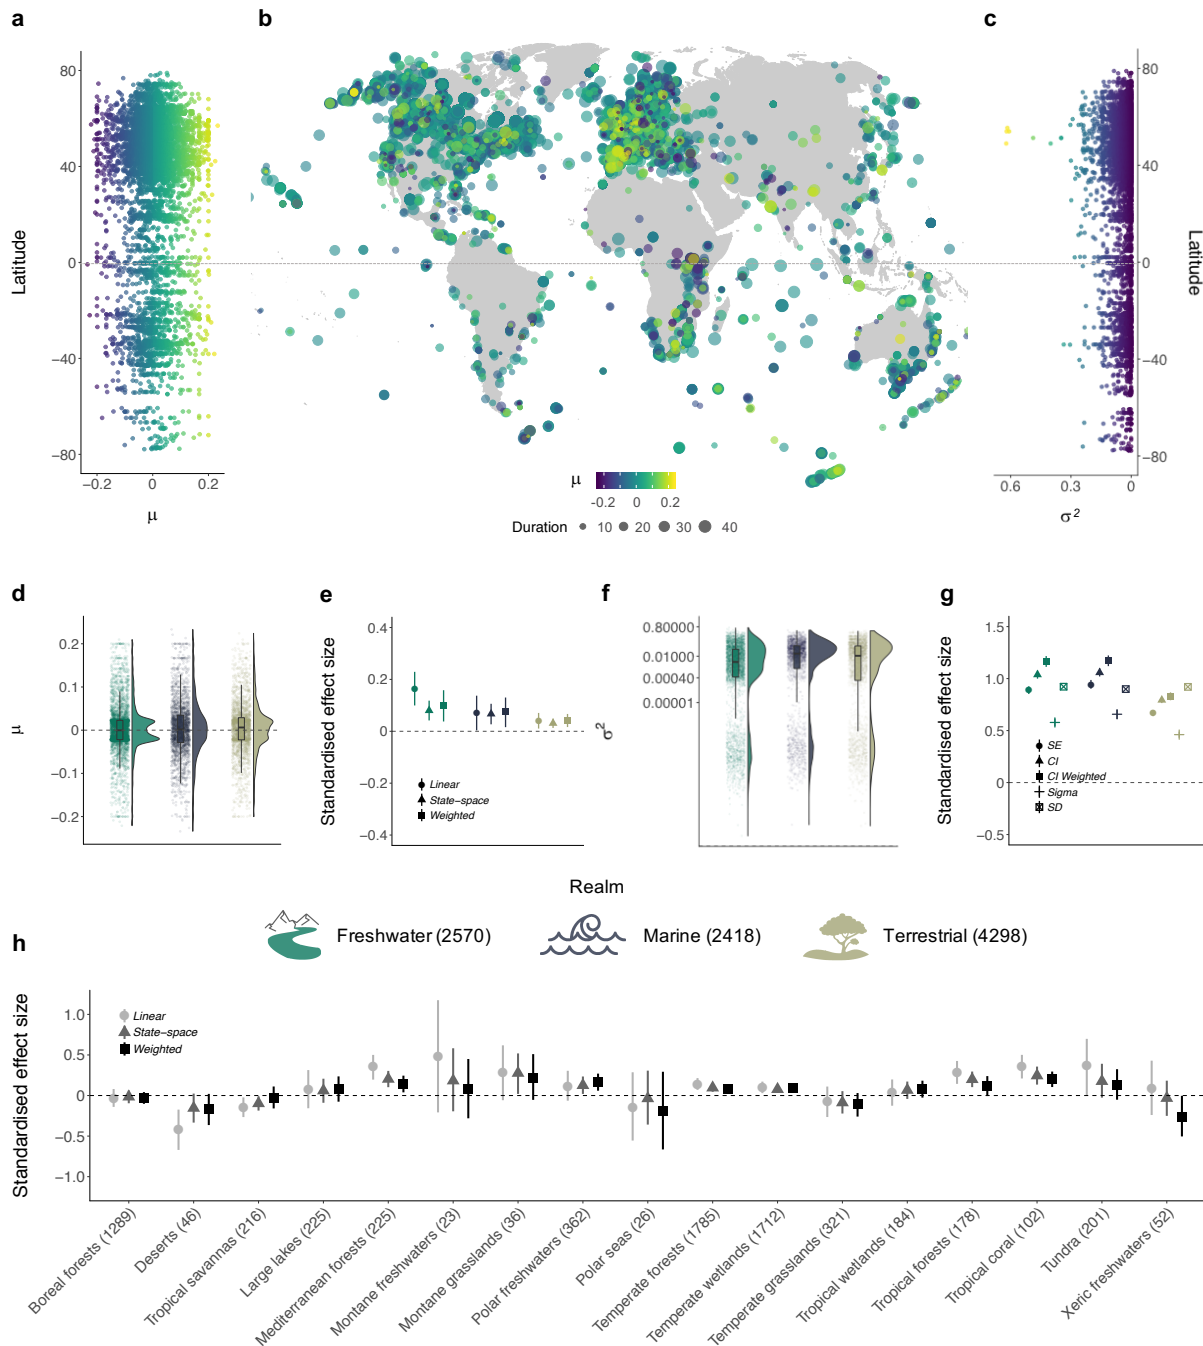

**Figure 1. Population declines, increases and fluctuations over time occur across all latitudes and biomes within the freshwater, marine and terrestrial realms.** Results include 9286 populations from 2084 species. The lack of biogeographic patterning in vertebrate population trends was also apparent on a UK scale (Figure S6 and Table S2). The numbers in

the legend for plots **d-g** and on the x axis in plot **c** show the sample sizes for realms and biomes, respectively. The  $\mu$  values of population trend (plots **a-b**, **d-e**, **h**) and the  $\sigma^2$  values of population fluctuation (plots **c**, **f-g**) were derived from state-space model fits of changes in abundance over the monitoring duration for each population. Plots **d** and **f** show the density distribution of population trends across realms, the raw values (points) and boxplots with the mean, first and third quartiles and boxplot whiskers that indicate the distance that covers 1.5 times the interquartile range. Plots **e**, **g** and **h** show the effect sizes and the 95% credible intervals of population trends (**e**, **h**) across realms and biomes, and fluctuations across realms (**g**). For variation in fluctuations across biomes, see SI Figure S9. The three estimates for each realm/system in plots **e** and **h** refer to different analytical approaches: population trends calculated using linear models (circles), state-space models ( $\mu$ , triangles), and population trends ( $\mu$ ) weighted by  $\tau^2$ , the observation error estimate from the state-space models (squares). The five estimates in plot **g** refer to different analytical approaches, where the response variables in the models were: 1) the standard error around the slope estimates of the linear model fits of abundance versus year (circles), 2) half of the 95% confidence interval around the  $\mu$  value of population change (triangles), 3) half of the 95% confidence interval around  $\mu$  weighted by  $\tau^2$ , (full squares), 4) the process noise ( $\sigma^2$ ) from the state-space models, and 5) the standard deviation of the raw data for each population time series (empty squares). Effect sizes were standardized by dividing the effect size by the standard deviation of the corresponding input data. The process noise is the total variance around the population trend minus the variance attributed to observation error. Error bars in plots **e**, **g** and **h** show 95% credible intervals. See Table S2 for model outputs.

## **Taxonomic and phylogenetic patterns of population trends and fluctuations**

We found taxonomic, but not phylogenetic patterns, in population trends and fluctuations over time among nearly 10 000 populations from over 2000 vertebrate species, with amphibians

emerging as the taxa experiencing pronounced declines (Figure 2, Table S2). Amphibians experienced net declines over time (slope = -0.01, CI = -0.02 to -0.005), whereas birds, mammals and reptiles experienced net increases (slope = 0.004, CI = 0.003 to 0.01; slope = 0.01, CI = 0.01 to 0.01; slope = 0.02, CI = 0.01 to 0.02), with birds having a bimodal trend distribution indicating greater numbers of increasing and decreasing trends (Hartigans' dip test,  $D = 0.04$ ,  $p < 0.01$ , Figure 1a, see Figures S6, S7 and S13). Bony fish population trends were centred on zero (slope = -0.001, CI = -0.004 to 0.002, Figure 1a-b) and sharks and rays showed net declines, but the credible intervals overlapped zero (slope = -0.01, CI = -0.02 to 0.01). Fluctuations were most common for amphibian populations (slope = 0.04, CI = 0.036 to 0.049, Figure 2d), which were monitored for the shortest time period on average (11 years, Figure S1, Table S2). We did not detect finer scale species-level phylogenetic clustering of population change (both trends and fluctuations) within amphibian, bird and reptile classes (Figures 2 and S16, Table S4). Similarly, species identity within amphibian, bird and reptile classes did not explain variation in population trends or fluctuations (Figures 2 and S16, Table S4). There were no distinct clusters of specific clades that were more likely undergo increases, decreases or fluctuations in population abundance (Figure 2).

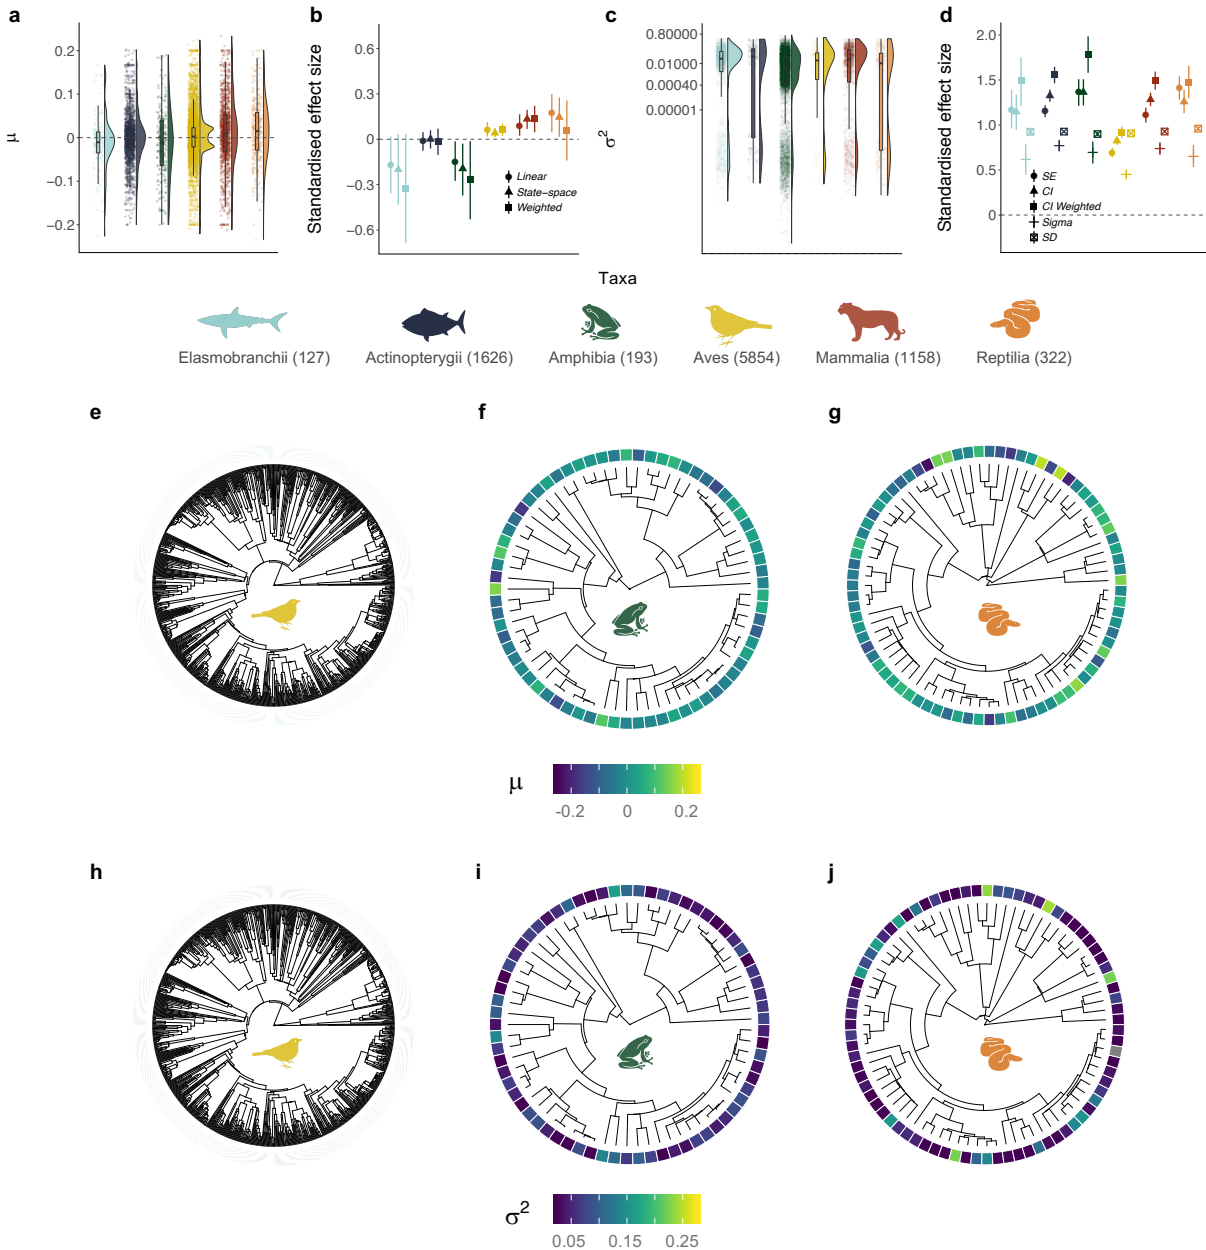

**Figure 2. Population trends and fluctuations varied more among, rather than within, taxa, with amphibians being the only group showing pronounced declines over time.** There were no distinct phylogenetic patterns in population trends and fluctuations (plots e-j). For details on phylogenetic models, see methods. Grey colour in the heatmap in plot h shows species for which no population trend data were available. The numbers in the legend for plots a-d show sample size for each taxon. The  $\mu$  values of population trend (plots a-b, e-g) and the  $\sigma^2$  values of



population fluctuation (plots **c-d**, **h-j**) were derived from state-space model fits of changes in abundance over the monitoring duration for each population. Plots **a** and **c** show the density distribution of population trends across taxa, the raw values (points) and boxplots with the mean, first and third quartiles and boxplot whiskers that indicate the distance that covers 1.5 times the interquartile range. Plots **b** and **d** show the effect sizes and the 95% credible intervals of population trends (**b**) and fluctuations (**d**) across the five studied taxa. Effect sizes (plots **b** and **d**) were standardized by dividing the effect size by the standard deviation of the corresponding input data. Error bars in plots **b** and **d** show 95% credible intervals. See Figure 1 caption for further details on effect sizes and Tables S2 and S4 for model outputs.

### **Population trends and fluctuations across rarity metrics, IUCN Red List Categories and threats**

Species-level metrics, such as rarity and global IUCN Red List Category, did not explain the heterogeneity in trends of monitored populations in the Living Planet Database. Both rare and common species experienced declines, increases and fluctuations in population abundance over time (Figures 3 and 4). Across these time series, species with smaller ranges, smaller population sizes, or narrower habitat specificity (i.e., rare species) were not more prone to population declines than common species (Figure 3, Table S2). Populations that experienced more fluctuations had smaller mean population sizes on average (slope = -0.001, CI = -0.001 to -0.001, Figure 3f). We found increasing, decreasing and stable populations across all IUCN Red List Categories (Figure 4a). For example, a population of the Least concern species red deer (*Cervus elaphus*) in Canada declined by 68% over seven years going from 606 to 194 individuals and a population of the critically endangered Hawksbill sea turtle (*Eretmochelys imbricate*) from Barbados increased by 269% over seven years going from 89 to 328 individuals. We found more fluctuations (Least concern: slope = 0.022, CI = 0.021 to 0.023; Critically endangered: slope =

0.035, CI = 0.028 to 0.041), but not more population declines, with increasing IUCN Red List Category (Figure 4, Table S2). Populations from species with a higher number of threats from the species' IUCN Red List profiles did not experience greater declines when compared to those categorised with a smaller number of threats (Figure 4f). There were no distinct signatures of threats from the species' IUCN Red List profiles that were associated with predominantly declining local trends of monitored populations (Figure 4e) and there were increasing, decreasing and stable trends across all threat types.

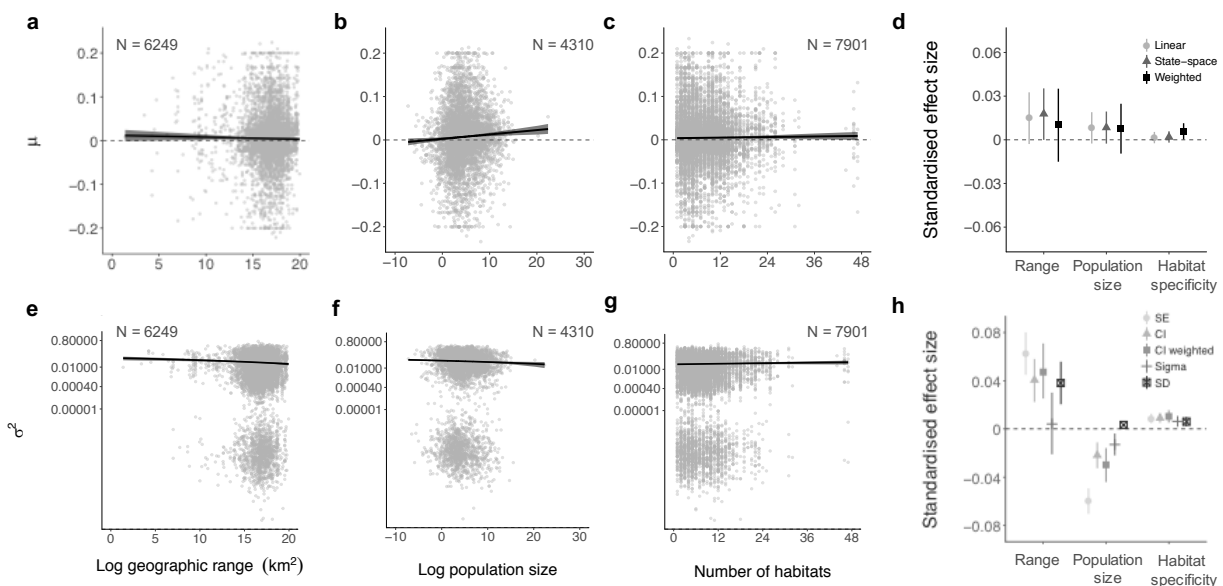

**Figure 3. Rarity metrics do not explain heterogeneity in local population trends, and both rare and common species experienced declines and increases over time, whereas smaller populations fluctuated more over time.** Numbers on plots show sample size for each metric. Rarity metrics were calculated for all species for which information was available and cover all taxa represented in the Living Planet Database, with the exception of geographic range, which refers to the global range of only bird and mammal species in the global Living Planet Database (plots a-e). The  $\mu$  values of population trend (plots a-d) and the  $\sigma^2$  values of population fluctuation

(plots **e-h**) were derived from state-space model fits of changes in abundance over the monitoring duration for each population. Plots **d** and **h** show the effect sizes and the 95% credible intervals of three rarity metrics on population trends (**d**) and fluctuations (**h**). Effect sizes (plots **d** and **h**) were standardized by dividing the effect size by the standard deviation of the corresponding input data. Error bars in plots **d** and **h** show 95% credible intervals. Lines on **a-c** and **e-g** show model fits and 95% credible intervals. See Figure 1 caption for further details on effect sizes and Table S2 for model outputs.

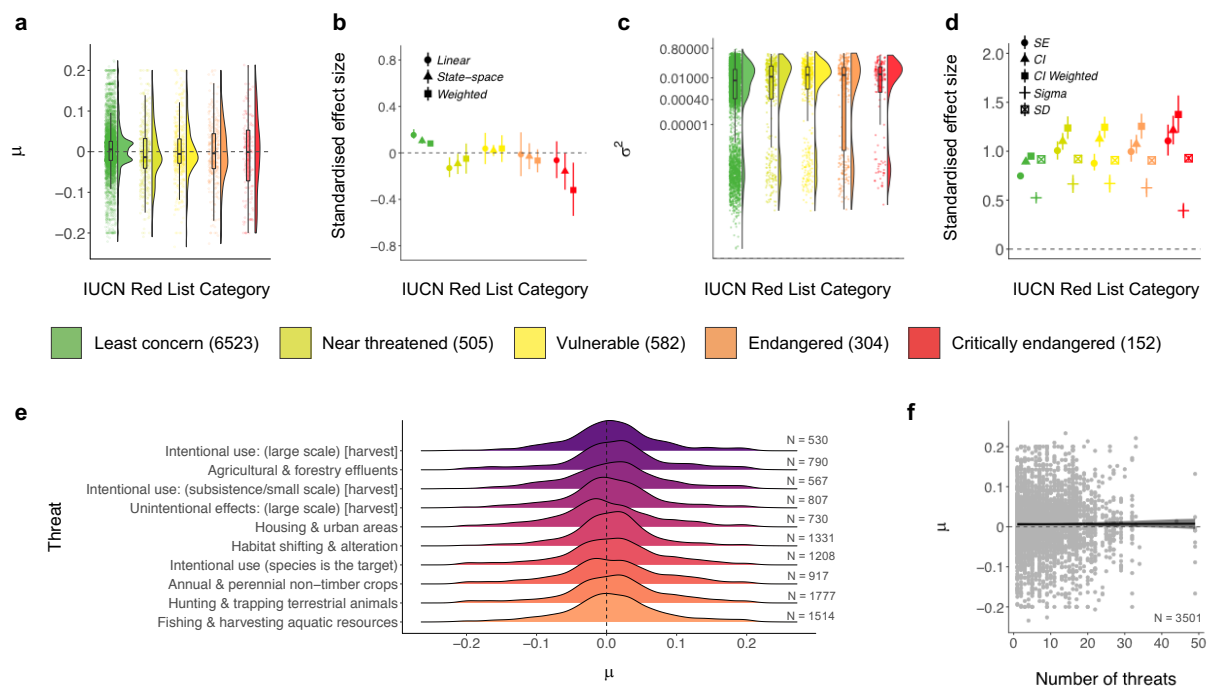

**Figure 4. On local scales, there are increasing, decreasing and stable populations across the full spectrum of the globally-determined species' IUCN Red List Category and anthropogenic threat type from the species' IUCN Red List profiles.** Numbers in the legend for plots **a-d** and in plots **e-f** show sample size for each metric. Plots **a** and **c** show the density distribution of population trends across Red List status, the raw values (points) and boxplots with the mean, first and third quartiles and boxplot whiskers that indicate the distance that covers 1.5

times the interquartile range. Plots **b** and **d** show the effect sizes and the 95% credible intervals of population trends (**b**) and fluctuations (**d**) across Red List status categories. The  $\mu$  values of population trend (plots **a**, **e-f**) and the  $\sigma^2$  values of population fluctuation (plots **c**) were derived from state-space model fits of changes in abundance over the monitoring duration for each population. For the relationships between type and number of threats and population fluctuations, see Figure S19. Plots **b** and **d** show the effect sizes and the 95% credible intervals for population trends (**b**) and fluctuations (**d**) across IUCN Red List Categories. Effect sizes (plots **b** and **d**) were standardized by dividing the effect size by the standard deviation of the corresponding input data. Error bars in plots **b** and **d** show 95% credible intervals. Plot **e** shows the distributions of population trends across different threats that the species face globally, with the central tendencies of all distributions overlapping with zero. Lines in plot **f** show model fit and 95% credible intervals, where “number of threats” refers to the number of different threats that each species, whose populations are locally monitored, are exposed to on a global scale. See Figure 1 caption for further details on effect sizes, Methods for details on deriving the number and types of threats and Table S2 for model outputs.

## Discussion

Taken together, our analysis of nearly 10 000 vertebrate population time series using a state-space modelling approach demonstrated ubiquitous alterations in vertebrate abundance over time across all biomes on Earth. We revealed that population change includes both increasing and decreasing populations and spans a wide spectrum of magnitudes, and while anthropogenic impacts have accelerated in recent decades, our results highlight that vertebrate species span a wide spectrum of population change across variation in the number and types of threats to which species might be exposed. Against a backdrop of no biogeographic patterning of population trends and fluctuations (Figure 1), we uncovered distinct taxonomic signals, with amphibians

representing the only taxa that exhibited pronounced net declines, while birds, mammals and reptiles on average became more abundant over time (Figure 2). Within amphibian, bird and reptile taxa, there was no distinct phylogenetic clustering of closely-related species experiencing similar population trends or fluctuations (Figure 2). We found that both rare and common species experienced the full spectrum of population change, from declines to no net changes and increases. Species' geographic range, mean population size and habitat specificity did not explain variation in population trends, but species with smaller population sizes were nevertheless more likely to fluctuate, potentially increasing their extinction risk (Figure 3). There was no consistent pattern of greater population declines with increasing IUCN Red List Category (Figure 4). On a global scale, the vertebrate species in the Living Planet Database are exposed to a variety of threats according to the species' IUCN Red List profiles, but on more local scales, none of the threats were characterized by predominantly declining populations (Figure 4), testifying to the diverse ways in which populations are likely responding to threats across the Anthropocene.

Contrary to our initial predictions, we did not find a distinct geographic patterning of population change around the world, nor a consistent trend of increasing declines in population abundance with increasing IUCN Red List Category (Figures 1 and 4). Similar lack of biogeographic signal has been documented in regional studies of population change from the Netherlands<sup>34</sup> and in temperate North America and Europe<sup>39</sup>. Coarsely represented biogeographic regions and global-scale species' IUCN Red List Categories and threat types might not capture the drivers acting in the locations of the specific populations we studied<sup>32,40–42</sup>. Furthermore, the same driver can have opposing effects on population abundance at different sites<sup>43</sup>. A lack of biome-specific directional trends in population change, despite a spatial clustering of human pressure around the world<sup>12</sup>, can also arise due to differences in species traits and vulnerability to environmental change within biomes<sup>16–18</sup>. Accounting for divergent responses of species to global change is key when

translating global policy, such as the upcoming post-2020 planetary biodiversity strategy<sup>44</sup>, into conservation actions implemented on scales much finer than biogeographic realms.

Our results highlight variation in population change among taxa, with amphibians emerging as the taxa experiencing the most pronounced declines in the Living Planet Database. The remaining taxa showed either stable or increasing net changes in abundance over time (Figure 2). Such taxonomic patterns could be driven by different taxon-specific factors including reproductive strategy, trophic level, generation time and life history traits<sup>45,46</sup>. For amphibians, population declines have been linked to the spread of a fungal disease (chytrid fungus, *Batrachochytrium dendrobatidis*), facilitated by global warming<sup>47</sup>, as well as habitat loss and Allee effects in small populations<sup>48</sup>. Within bird, amphibian and reptile taxa, phylogenetic relatedness and species-level taxonomic classification did not explain variation in population trends and fluctuations. A similar lack of phylogenetic dependencies has been detected for the population growth rates of migratory birds<sup>49</sup>. While phylogenetic clustering might be lacking in contemporary trends, there is evidence that phylogenetic relatedness predicts extinction, a process occurring over much longer time scales<sup>6,7</sup>. Over shorter time periods, species' traits and ability to persist, reproduce and disperse in ever changing landscapes might be influencing local abundance<sup>16</sup>, which has created a mix of winners and losers across all taxa<sup>15</sup>. We demonstrate ongoing alterations in the abundances of six vertebrate taxa which over time, may lead to shifts in community composition and ultimately alter ecosystem function as some species become locally extinct whilst others become more abundant<sup>9,10</sup>.

Surprisingly, our results indicate that despite decades of conservation focus on rare species<sup>19–21</sup>, both rare and common species in the Living Planet Database experienced declines and increases in population abundance over the period of monitoring. The lack of rarity effects on population

trends can be explained by theory and empirical evidence demonstrating that small populations do not necessarily have a higher likelihood of experiencing declines and some species are able to persist in small, but stable populations<sup>50</sup>. The power of rarity metrics to predict population trends could also be mediated by whether species are naturally rare, or have become rare due to external drivers in recent years<sup>51,52</sup>. Naturally rare species might be more likely to persist over time, whereas species that have more recently become rare might be more likely to decline in response to environmental disturbance. Furthermore, the timing and magnitude of past and current disturbance events influence population trends<sup>43,53</sup> and there could be temporal lags in both positive and negative abundance changes over time<sup>43,54</sup>. However, disentangling the processes leading to rarity over time remains challenging, and across the 2084 species we studied, there are likely cases of both natural and human-driven vertebrate population change. We found that species with small populations were, nevertheless, more likely to fluctuate (Figure 3f), which may increase their probability of extinction, a process that could play out over longer time-scales than found for most population monitoring time series to date<sup>22,23,55</sup>. Our results highlight that rarity metrics alone do not capture the heterogeneity in local population change over time, and common species should not be overlooked in conservation prioritization decisions as they could be as likely to decrease in abundance over time as rare species.

Our finding that declines are not universal, or even predominant, for vertebrate populations monitored for longer than five years in the Living Planet Database contrasts with reports of an overall decline in the Living Planet Index<sup>56</sup>, a weighted summary of population change across all abundance time series in the Living Planet Database. Consistent with our results, the Living Planet Reports<sup>56–58</sup> also document that the numbers of declining and increasing species are similar across this database, but the Living Planet Reports document a larger magnitude of population declines relative to increases. The calculation of the Living Planet Index involves

differential weighting of population trends derived using logged abundance data, geometric means and generalized additive models, which could explain the discrepancies between our study findings and those of the Living Planet Reports<sup>59</sup>. The Living Planet Index is hierarchically averaged from populations to species, taxa and realm and is also weighted by the estimated and relative number of species within biomes, which influences the direction and magnitude of the Living Planet Index<sup>59,60</sup>. In contrast, our analysis explores the heterogeneity in local trends and fluctuations of monitored species from the raw population abundance data, and thus, we did not use an index with weightings and we did not aggregate population trends to a species-level. Rather than summarising trends with an index, our goal was to explain variability in abundance over time across better monitored vertebrates around the world. We detected net population declines at local scales over time only in the amphibian taxa, in contrast with the overall negative trend of the aggregate weightings of the Living Planet Index<sup>56</sup>. We caution that distilling the heterogeneity of local population change at sites around the world into a simple metric may hide diverging trends at local scales, where we found both increases and declines among species.

The magnitude and strength of population trends could be influenced by how long populations are monitored<sup>61</sup>, as well as whether monitoring began during a population peak or a population trough<sup>62</sup>. While overall, we did not find a strong effect of duration on the detected population trends in the Living Planet Database (Figures S7-8, Table S2), our findings demonstrated that for reptiles, time series with longer durations are more likely to capture declines (Table S2). We also found a bimodal pattern of weak population increases and decreases in time series with longer durations particularly for terrestrial bird species with the monitoring unit being an index (Figure S13). Seven key challenges have been identified when drawing robust inference about population trends over time: establishment of the historical baseline, representativeness of site selection, robustness of time series trend estimation, mitigation of detection bias effects, and ability to



account for potential artefacts of density dependence, phenological shifts and scale-dependence in extrapolation from sample abundance to population-level inference<sup>63</sup>. New methods to rigorously account for different sources of uncertainty in time series monitoring will allow the analyses of available population data to better inform global estimates of net trends across taxa.

The strength of documented relationships between population dynamics and global change could be influenced by how well-monitored populations capture the full range of variation in driver intensity. To attribute population trends and fluctuations to site-specific anthropogenic drivers, we need to go beyond previous studies that have focused exclusively on declines and extinctions<sup>5,64</sup>. We require attribution analyses that statistically test the links between observed changes in ecosystems and the experienced extrinsic pressure<sup>3</sup>. Through attribution studies that encompass the full spectrum of population change, including positive, negative and stable trends<sup>43,65</sup>, we can better understand the variety of ways in which climate change, land-use change and other drivers are altering global biodiversity. For a subset of the bird populations in the Living Planet Database, greater warming of temperatures corresponded with a higher likelihood of population declines over time<sup>65</sup>, which could be caused by worldwide and cross-biome phenological mismatches between breeding and resource availability<sup>66</sup>. Across terrestrial species represented in the Living Planet Database, peak forest loss was associated with accelerations in both population increases and decreases in the period following habitat alteration<sup>43</sup>. There is evidence from the marine realm that when species are simultaneously exposed to multiple drivers, the resulting biodiversity effects are antagonistic and could produce patterns of no net biodiversity changes<sup>67</sup>. The next critical step is to test how multiple global change drivers together<sup>12</sup> influence populations across both terrestrial and marine realms and determine how these relationships are mediated by species' traits and vulnerability to extrinsic threats<sup>68</sup>.

In summary, our global analysis reveals the ubiquitous nature of population change over time across monitored vertebrate species. We show that in a time of accelerating global change, there were as many increases as there are decreases in population abundance over time. Among this heterogeneity, we uncovered pronounced declines in amphibian abundance as well as net abundance increases for birds, mammals and reptiles in the Living Planet Database. The taxonomic patterning of population change highlights amphibians as a conservation priority, especially as their declines can have further cascading effects across trophic levels within ecosystems. Rarity metrics, specifically geographic range, mean population size and habitat specificity, as well as IUCN Red List Categories, threat types and numbers, and evolutionary history, did not explain the heterogeneity in population change across the data analysed in this study. Our findings caution the use of rarity metrics as a proxy for future global population trends, but suggest that such metrics, in particular mean population size, are nevertheless indicators of population fluctuations, which might ultimately be related to increased species extinction risk. On a global scale, both rare and common vertebrate species face numerous threats due to resource exploitation and habitat change. As human activities continue to accelerate, the next key step is to determine how intrinsic factors, such as rarity attributes and threats, interact with extrinsic global change drivers and together influence the persistence of Earth's biota. Capturing the complexity of species' population dynamics will improve our estimates of shifts in community composition and ultimately the impact of altered ecosystem functions and services around the world.

## **Methods**

All data syntheses, visualization and statistical analyses were conducted using R version 3.5.1<sup>69</sup>. For conceptual diagrams of our workflow, see Figures S1 and S2.

## **Data sources**

### *Population data*

To quantify vertebrate population change (trends and fluctuations), we extracted the abundance data for 9286 population time series from 2084 species from the publicly available Living Planet Database<sup>70</sup> ([http://www.livingplanetindex.org/data\\_portal](http://www.livingplanetindex.org/data_portal)) that covered the period between 1970 and 2014 (Table S1). These time series represent repeated monitoring surveys of the number of individuals in a given area, hereafter called “populations”. Monitoring duration differed among populations, with a mean duration of 23.9 years and a mean sampling frequency of 23.3 time points (Figure S1, see SI Figures S7 and S8 for effects of monitoring duration on detected trends). In the Living Planet database, 17.9% of populations were sampled annually or in rare cases multiple times per year. The time series we analysed include vertebrate species that span a large variation in age, generation times and other demographic-rate processes. For example, from other work that we have conducted, we have found that when generation time data were available (approximately 50.0% or 484 out of 968 bird species, and 15.6% or 48 out of 306 mammal species), the mean bird generation time is 5.0 years (min = 3.4 years, max = 14.3 years) and the mean mammal generation time is 8.3 years (min = 0.3 years, max = 25 years)<sup>43</sup>. Thus, we believe that most vertebrate time series within the LPD capture multiple generations.

In our analysis, we omitted populations which had less than five time points of monitoring data, as previous studies of similar population time series to the ones we have analysed have found that shorter time series might not capture directional trends in abundance<sup>61</sup>. Populations were monitored using different metrics of abundance (e.g., population indices vs. number of individuals). Before analysis, we scaled the abundance of each population to a common

magnitude between zero and one to analyse within-population relationships to prevent conflating within-population relationships and between-population relationships<sup>71</sup>. Scaling the abundance data allowed us to explore trends among populations relative to the variation experienced across each time series.

#### *Phylogenetic data*

We obtained phylogenies for amphibian species from <https://vertlife.org><sup>4</sup>, for bird species from <https://birdtree.org><sup>8</sup>, and for reptile species from <https://vertlife.org><sup>6</sup>. For each of the three classes (*Amphibia*, *Aves* and *Reptilia*), we downloaded 100 trees and randomly chose 10 for analysis (30 trees in total). Species-level phylogenies for the classes *Actinopterygii* and *Mammalia* have not yet been resolved with high confidence<sup>72,73</sup>.

#### *Rarity metrics, IUCN Red List Categories and threat types*

We defined rarity following a simplified version of the ‘seven forms of rarity’ model<sup>74</sup>, and thus consider rarity to be the state in which species exist when they have a small geographic range, low population size, or narrow habitat specificity. We combined publicly available data from three sources: 1) population records for vertebrate species from the Living Planet Database to calculate mean population size, 2) occurrence data from the Global Biodiversity Information Facility<sup>75</sup> (<https://www.gbif.org>) and range data from BirdLife<sup>76</sup> (<http://datazone.birdlife.org>) to estimate geographic range size, and 3) habitat specificity and Red List Category data for each species from the International Union for Conservation<sup>77</sup> (<https://www.iucnredlist.org>). The populations in the Living Planet Database<sup>70</sup> do not include species that have gone extinct on a global scale. We extracted the number and types of threats that each species is exposed to globally from their respective species' IUCN Red List profiles<sup>77</sup>.

## Quantifying population trends and fluctuations over time

In the first stage of our analysis, we used state-space models that model abundance (scaled to a common magnitude between zero and one) over time to calculate the amount of overall abundance change experienced by each population ( $\mu$ ,<sup>38,78</sup>). State-space models account for process noise ( $\sigma^2$ ) and observation error ( $\tau^2$ ) and thus deliver robust estimates of population change when working with large datasets where records were collected using different approaches, such as the Living Planet Database<sup>39,79,80</sup>. Previous studies have found that not accounting for process noise and measurement error could lead to over-estimation of population declines<sup>81</sup>, but in our analyses, we found that population trends derived from state-space models were similar to those derived from linear models. Positive  $\mu$  values indicate population increase and negative  $\mu$  values indicate population decline. State-space models partition the variance in abundance estimates into estimated process noise ( $\sigma^2$ ) and observation or measurement error ( $\tau^2$ ) and population trends ( $\mu$ ):

$$X_t = X_{t-1} + \mu + \varepsilon_t, (1)$$

where  $X_t$  and  $X_{t-1}$  are the scaled (observed) abundance estimates (between 0 and 1) in the present and past year, with process noise represented by  $\varepsilon_t \sim \text{gaussian}(0, \sigma^2)$ . We included measurement error following:

$$Y_t = X_t + F_t,$$

where  $Y_t$  is the estimate of the true (unobserved) population abundance with measurement error:

$$F_t \sim \text{gaussian}(0, \tau^2).$$

We substituted the estimate of population abundance ( $Y_t$ ) into equation 1:

$$Y_t = X_{t-1} + \mu + \varepsilon_t + F_t.$$

Given  $X_{t-1} = Y_{t-1} - F_{t-1}$ , then:

$$Y_t = Y_{t-1} + \mu + \varepsilon_t + F_t - F_{t-1}.$$

For comparisons of different approaches to modelling population change, see *Comparison of modelling approaches* section.

### **Quantifying rarity metrics**

We tested how population change varied across rarity metrics – geographic range, mean population size and habitat specificity – on two different but complementary scales. In the main text, we presented the results of our global scale analyses, whereas in the SI, we included the results when using only populations from the UK – a country with high monitoring intensity. Thus, we quantified rarity metrics for species monitoring globally and in the UK.

#### *Geographic range*

To estimate geographic range for bird species monitored globally, we extracted the area of occurrence in km<sup>2</sup> for all bird species in the Living Planet Database that had records in the BirdLife Data Zone<sup>76</sup>. For mammal species' geographic range, we used the PanTHERIA database<sup>82</sup> (<http://esapubs.org/archive/ecol/E090/184/>). To estimate geographic range for bony fish, birds, amphibians, mammals and reptiles monitored in the UK (see Table S5 for species list), we calculated a km<sup>2</sup> occurrence area based on species occurrence data from GBIF<sup>75</sup>. Extracting and filtering GBIF data and calculating range was computationally-intensive and occurrence data availability was lower for certain species. Thus, we did not estimate geographic range from GBIF data for all species part of the Living Planet Database. Instead, we focused on analysing range effects for birds and mammals globally, as they are a very well-studied taxon and for species monitored in the UK, a country with intensive and detailed biodiversity monitoring of vertebrate species. We did not use IUCN range maps, as they were not available for all of our study species, and previous studies using GBIF occurrences to estimate range have found a positive correlation between GBIF-derived and IUCN-derived geographic ranges<sup>83</sup>.

552

553 For the geographic ranges of species monitored in the UK, we calculated range extent using a  
554 minimal convex hull approach based on GBIF<sup>75</sup> occurrence data. We filtered the GBIF data to  
555 remove invalid records and outliers using the *CoordinateCleaner* package<sup>84</sup>. We excluded records  
556 with no decimal places in the decimal latitude or longitude values, with equal latitude or longitude,  
557 within a one-degree radius of the GBIF headquarters in Copenhagen, within 0.0001 degrees of  
558 various biodiversity institutions and within 0.1 degrees of capital cities. For each species, we  
559 excluded the lower 0.02 and upper 0.98 quantile intervals of the latitude and longitude records to  
560 account for outlier points that are records from zoos or other non-wild populations. We drew a  
561 convex hull to most parsimoniously encompass all remaining occurrence records using the *chull*  
562 function, and we calculated the area of the resulting polygon using *areaPolygon* from the  
563 *geosphere* package .

564

#### 565 *Mean size of monitored populations*

566 We calculated mean size of the monitored population, referred to as population size, across the  
567 monitoring duration using the raw abundance data, and we excluded populations which were not  
568 monitored using population counts (i.e., we excluded indexes).

569

#### 570 *Habitat specificity*

571 To create an index of habitat specificity, we extracted the number of distinct habitats a species  
572 occupies based on the IUCN habitat category for each species' profile, accessed through the  
573 package *rredlist*<sup>86</sup>. We also quantified habitat specificity by surveying the number of breeding and  
574 non-breeding habitats for each species from its online IUCN species profile (the 'habitat and  
575 ecology' section). The two approaches yielded similar results (Figure S3, Table S2, key for the

profiling method is presented in Table S4). We obtained global IUCN Red List Categories and threat types for all study species through the IUCN Red List profiles<sup>77</sup>.

### Testing the sources of variation in population trends and fluctuations

In the second stage of our analyses, we modelled the trend and fluctuation estimates from the first stage across latitude, realm, biome, taxa, rarity metrics, phylogenetic relatedness, species' IUCN Red List Category and threat type using a Bayesian modelling framework through the package *MCMCglmm*<sup>87</sup>. We included a species random intercept effect in the Bayesian models to account for the possible correlation between the trends of populations from the same species (see Table S1 for sample sizes). The models ran for 120 000 iterations with a thinning factor of ten and a burn-in period of 20 000 iterations. We assessed model convergence by visually examining trace plots. We used weakly informative priors for all coefficients (an inverse Wishart prior for the variances and a normal prior for the fixed effects):

$$Pr(\mu) \sim N(0, 10^8)$$

$$Pr(\sigma^2) \sim \text{Inverse Wishart}(V = 0, nu = 0)$$

### *Population trends and fluctuations across latitude, biomes, realms and taxa*

To investigate the geographic and taxonomic patterns of population trends and fluctuations, we modelled population trends ( $\mu$ ) and population fluctuations ( $\sigma^2$ ), derived from the first stage of our analyses (state-space models), as a function of 1) latitude, 2) realm (freshwater, marine, terrestrial), 3) biome (as defined by the 'biome' category in the Living Planet Database, e.g., 'temperate broadleaf forest'<sup>88</sup> and 4) taxa (*Actinopterygii*, bony fish; *Elasmobranchii*, sharks and rays; *Amphibia*, amphibians; *Aves*, birds; *Mammalia*, mammals; *Reptilia*, reptiles). We used



separate models for each variable, resulting in four models testing the sources of variation in trends and four additional models focusing on fluctuations. Each categorical model from this second stage of our analyses was fitted with a zero intercept to allow us to determine if net population trends differed from zero for each of the categories under investigation. The model structures for all models with a categorical fixed effect were identical with the exception of the identity of the fixed effect, and below we describe the taxa model:

$$\mu_{i,j,k} = \beta_0 + \beta_{0j} + \beta_1 * taxa_{i,j,k},$$

$$y_{i,j,k} \sim \text{gaussian}(\mu_{i,j,k}, \sigma^2),$$

where  $taxa_{i,j,k}$  is the taxa of the  $i$ th time series from the  $j$ th species;  $\beta_0$  and  $\beta_1$  are the global intercept (in categorical models,  $\beta_0 = 1$ ) and the slope estimate for the categorical taxa effect (fixed effect),  $\beta_{0j}$  is the species-level departure from  $\beta_0$  (species-level random effect);  $y_{i,j,k}$  is the estimate for change in population abundance for the  $i$ th population time series from the  $j$ th species from the  $k$ th taxa.

### *Population trends and fluctuations across amphibian, bird and reptile phylogenies*

To determine if there is a phylogenetic signal in the patterning of population change within amphibian, bird and reptile taxa, we modelled population trends ( $\mu$ ) and fluctuations ( $\sigma^2$ ) across phylogenetic and species-level taxonomic relatedness. We conducted one model per taxa per population change variable – trends or fluctuations using Bayesian linear mixed effects models using the package *MCMCglmm*<sup>87</sup>. We included phylogeny and taxa as random effects. The models did not include fixed effects. We assessed the magnitude of the random effects (phylogeny and species) by inspecting their posterior distributions, with a distribution pushed up against zero indicating lack of effect, since these distributions are always bounded by zero and have only positive values. We used parameter-expanded priors, with a variance-covariance

structure that allows the slopes of population trend (the  $\mu$  values from the first stage analysis using state-space models) to covary for each random effect. The prior and model structure were as follows:

$$Pr(\mu) \sim N(0, 10^8),$$

$$Pr(\sigma^2) \sim \text{Inverse Wishart } (V = 1, nu = 1),$$

$$\mu_{i,k,m} = \beta_0 + \beta_{0k} + \beta_{0m},$$

$$y_{i,k,m} \sim \text{gaussian}(\mu_{i,k,m}, \sigma^2),$$

where  $\beta_0$  is the global intercept ( $\beta_0 = 1$ ),  $\beta_{0l}$  is the phylogeny-level departure from  $\beta_0$  (phylogeny random effect);  $y_{i,k,m}$  is the estimate for change in population abundance for the  $i$ th population time series for the  $k$ th species with the  $m$ th phylogenetic distance.

To account for phylogenetic uncertainty, for each class, we ran ten models with identical structures but based on different randomly selected phylogenetic trees. We report the mean estimates and their range for each class.

#### *Population trends and fluctuations across rarity metrics*

To test the influence of rarity metrics (geographic range, mean population size and habitat specificity) on variation in population trends and fluctuations, we modelled population trends ( $\mu$ ) and fluctuations ( $\sigma^2$ ) across all rarity metrics. We conducted one Bayesian linear models per rarity metric per model per scale (for both global and UK analyses) per population change variable – trends or fluctuations. The response variable was population trend ( $\mu$  values from state-space models) or population fluctuation ( $\sigma^2$  values from state-space models), and the fixed effects were

geographic range (log transformed), mean population size (log transformed) and habitat specificity (number of distinct habitats occupied). The model structures were identical across the different rarity metrics and below we outline the equations for population trends and geographic range:

$$\mu_{i,k,n} = \beta_0 + \beta_{0k} + \beta_1 * geographic\ range_{i,k,n},$$

$$y_{i,k,n} \sim gaussian(\mu_{i,k,n}, \sigma^2),$$

where  $geographic\ range_{i,k,n}$  is the logged geographic range of the  $k$ th species in the  $i$ th time series;  $\beta_0$  and  $\beta_1$  are the global intercept and slope estimate for the geographic range effect (fixed effect),  $\beta_{0j}$  is the species-level departure from  $\beta_0$  (species-level random effect);  $y_{i,k,n}$  is the estimate for change in population abundance for the  $i$ th population time series from the  $j$ th species with the  $n$ th geographic range.

#### *Population trends across species' IUCN Red List Categories*

To investigate the relationship between population change and species' Red List Categories, we modelled population trends ( $\mu$ ) and fluctuations ( $\sigma^2$ ) as a function of Red List Category (categorical variable). We conducted one Bayesian linear model per population change metric per scale (for both global and UK analyses). To test variation in population trends and fluctuations across the types and number of threats to which species are exposed, we conducted a post-hoc analysis of trends and fluctuations across threat type (categorical effect) and number of threats that each species is exposed to across its range (in separate models). The model structures were identical to those presented above, except for the fixed effect which was a categorical IUCN Red List Category variable.

The analytical workflow of our analyses is summarized in conceptual diagrams (Figures S1 and S2) and all code is available on GitHub (<https://github.com/gndaskalova/PopChangeRarity>, DOI 10.5281/zenodo.3817207).

## **Data limitations**

### *Taxonomic and geographic gaps*

Our analysis is based on 9286 monitored populations from 2084 species from the largest currently available public database of population time series, the Living Planet Database<sup>70</sup>. Nevertheless, the data are characterized by both taxonomic and geographic gaps that can influence our findings. For example, there are very few population records from the Amazon and Siberia (Figure 1b) – two regions currently undergoing rapid environmental changes due to land-use change and climate change respectively. Additionally, birds represent 63% of all population time series in the Living Planet Database, whilst taxa such as amphibians and sharks where we find declines are included with fewer records (Figures 2 and S5). On a larger scale, the Living Planet Database under-represents populations outside of Europe and North America and over-represents common and well-studied species<sup>60</sup>. We found that for the populations and species represented by current monitoring, rarity does not explain variation in population trends, but we note that the relationship between population change and rarity metrics could differ for highly endemic specialist species or species different to the ones included in the Living Planet Database<sup>89</sup>. As ongoing and future monitoring begins to fill in the taxonomic and geographic gaps in existing datasets, we will be able to re-assess and test the generality of the patterns of population change across biomes, taxa, phylogenies, species traits and threats.

### *Monitoring extent and survey techniques*

The Living Planet Database combines population time series where survey methods were consistent within time series but varied among time series. Thus, among populations, abundance was measured using different units and over varying spatial extents. There are no estimates of error around the raw population abundance values available and detection probability likely varies among species. Thus, it is challenging to make informed decisions about baseline uncertainty in abundance estimates without prior information. We used state-space models to estimate trends and fluctuations to account for these limitations as this modelling framework is particularly appropriate for analyses of data collected using disparate methods<sup>39,79,80</sup>. Another approach to partially account for observer error that has been applied to the analysis of population trends is the use of occupancy models<sup>34</sup>. Because the precise coordinates of the polygons where the individual populations were monitored are not available, we were not able to test for the potential confounding effect of monitoring extent, but our sensitivity analysis indicated that survey units do not explain variation in the detected trends (Figure S13).

#### *Temporal gaps*

The population time series we studied cover the period between 1970 and 2014, with both duration of monitoring and the frequency of surveys varying across time series. We omitted populations which had less than five time points of monitoring data, as previous studies of similar population time series data have found that shorter time series are less likely to capture directional trends in abundance<sup>61</sup>. In a separate analysis, we found significant lags in population change following disturbances (forest loss) and that population monitoring often begins decades to centuries after peak forest loss has occurred at a given site<sup>43</sup>. The findings of this related Daskalova *et al.* (in press) study suggest that the temporal span of the population monitoring does not always capture the period of intense environmental change and lags suggest that there might be abundance changes that have not yet manifested themselves. Thus, the detected trends and

the baseline across which trends are compared might be influenced by when monitoring takes place and at what temporal frequency. Challenges of analysing time series data are present across not just the Living Planet Database that we analysed, but more broadly across population data in general, including invertebrate datasets<sup>63</sup>. Nevertheless, the Living Planet Database represents the most comprehensive compilation of vertebrate temporal population records to date, allowing for the most comprehensive analyses possible into the patterns of vertebrate trends and fluctuations around the world.

#### *Time series with low variation*

Eighty populations (<1% of the 9286 time series) had very little variance (see Table S7 for full references for those studies). The majority of those studies are for bird species and come from the North American breeding bird survey with a measurement unit of an index<sup>90</sup>. We have also observed some time series that appear to show logistic relationships with little natural variance (e.g., time series 468, 10193, 17803, see Table S8 for full references). Inspecting the raw data showed that some populations have abundances which follow an almost perfect linear or logarithmic increase over time, as could be the case for modelled, versus raw field data. We provide the references for these studies and cannot definitely attribute the low variance to a particular cause across all studies. Some of these studies are reported in units that are an index which may not capture variation in the same way as other raw units of population data. Some of these time series may represent modelled population data based on demographic information rather than only direct observations of populations (e.g., time series 1355<sup>91</sup>). We chose to not remove studies that may not be raw observation time series based on visual inspection of trends to avoid introducing bias against populations with naturally low variation into our analysis.

739

740 *Clustering in the values of population trends and fluctuations*

741 We found a clustering of population trend and fluctuations values in some parts of the population  
742 change spectrum. For example, we found two peaks – in small increases and in small decreases  
743 over time – which were most prevalent in terrestrial bird studies and species which were monitored  
744 using an index (Figure 2, Figure S13). Overall 11.4% of time series had trend values between  
745 0.02 and 0.03 and 11.6% of time series had trend values between -0.03 and -0.02. There was  
746 also a similar, but smaller, clustering around trends of 0.25 and -0.25. All reported population  
747 trends are from models that converged successfully, and visual inspection indicated to us that the  
748  $\mu$  values are appropriate estimates for the individual time series (Figure S7e). We investigated  
749 the population time series where the value of the population trends over time were estimated to  
750 be the same value and found that they came from a variety of taxa, locations and survey methods  
751 (Figure S7e). We hypothesise that there might be a publication bias against publishing no net  
752 change studies, which could explain the trough in  $\mu$  values of around zero in long-term studies.  
753 The clustering of values for some time series may sometimes be associated with the same time  
754 series that also have low variance (Figure S7e, see discussion above). With the information  
755 available in the Living Planet Database metadata, we cannot fully explain the clustering in  
756 population trends. We advocate for more detailed metadata in future versions of the Living planet  
757 database to allow researchers to filter the database appropriately for individual analyses.

758

759 *Challenges in estimating geographic range*

760 Estimating geographic range across taxa, and specifically for species that are not birds or  
761 mammals, remains challenging due to data limitations. We used a static measure of geographic

range, which does not account for changes in species distributions over time. Furthermore, species could naturally have a small range or the small range size could be due to historic habitat loss<sup>92</sup>. The UK populations included in the Living Planet Database are predominantly from species with wide geographic ranges (Table S3), and our global scale analysis of the relationship between population change and geographic range is based on mammal and bird data. As data availability improves, future research will allow us to test the effect of geographic range on the trends of other taxa, such as amphibians and sharks.

## **Sensitivity analyses**

### *Trends relative to null expectation*

We tested whether the number of increasing and decreasing populations trends differed from a null expectation using a data randomisation approach (Figure S6b). We used linear models to estimate trends in the data and randomized data with identical structure to the Living Planet Database. We found that there were over 10 times more population declines and increases in the real data relative to the randomised data (2.29% of trends were declining and 2.30% were increasing in the randomised data, versus 28.9% and 32.5% of time series which had significant negative and positive slopes in the real data, respectively).

### *Monitoring duration, sampling methods and site-selection bias*

To assess the influence of monitoring duration on population trends, we used a Bayesian linear model. We modelled population trend ( $\mu$ ) as a function of monitoring duration (years) for each population, fitted with a zero intercept, as when duration is zero, no population change has occurred. Monitoring duration was weakly positively related to vertebrate population trends, with slightly greater population increases found for longer duration studies (Figure S7, Table S2). There was a similar weakly positive effect of number of time points within time series (Table S2).



Additionally, we tested if monitoring duration influenced the relationships between population trends across systems, and population trends across taxa. We found that duration did not influence those relationships, with the exception of reptiles, where declines were more frequent as monitoring duration increased (Table S2). Variation in population trends was not explained by sampling method across the five most commonly used abundance metrics (population index, number of individuals, number of pairs, number of nests and population estimate, Figure S13). Following Fournier *et al.* 2019<sup>62</sup>, we tested the time series that we analysed for site-selection bias. Removing the first five survey points reduces the bias stemming from starting population surveys at points when individual density is high, whereas removing the last five years reduces the bias of starting surveys when species are very rare. The distribution of population trend values across time series was not sensitive to the omission of the first five (left-truncation) or the last five years (right-truncation) of population records (Figure S6a). Additionally, we used a data randomisation approach to compare the distribution of trends from the real data to a null distribution and found different patterns (Figure S6b). Overall, our sensitivity analyses suggest that our findings are robust to the potential confounding effects of differences in monitoring duration, sampling method and site-selection.

#### *Comparison of modelling approaches*

We conducted the following supplementary analyses: in the second-stage Bayesian models estimating population trends across systems, biomes, taxa and rarity metrics, 1) we weighed  $\mu$  values by the square of  $\tau$ , the observation error estimate derived from the state-space models<sup>38</sup>, 2) we used slopes of linear model fits of abundance (scaled at the population level, centered on zero and with a standard deviation of one)<sup>71</sup> instead of the  $\mu$  estimates from state-space models, 3) we modelled the standard error around the slope values of the linear models, the error around  $\mu$  (half of the 95% confidence interval) and the standard deviation of the raw population data for

each time series as additional metrics of population variability. To allow comparison, we scaled the different metrics of population variability to be centred on zero and with a standard deviation of one before they were used as response variables in models. All different analytical approaches yielded very similar results (see main text and Figures S6, S7 and S10, Table S2).

## **Data availability**

Code for all data processing and analyses and summary datasets are publicly available on GitHub<sup>93</sup>. Raw data are available from the following websites: for population time series<sup>70</sup> - [http://www.livingplanetindex.org/data\\_portal](http://www.livingplanetindex.org/data_portal), GBIF occurrences<sup>75</sup> - <https://www.gbif.org>, bird geographic ranges<sup>76</sup> - <http://datazone.birdlife.org>, mammal geographic ranges<sup>82</sup> - <http://esapubs.org/archive/ecol/E090/184/>, species' habitat preferences, threat types and IUCN Red List Categories<sup>77</sup> - <https://www.iucnredlist.org>, and phylogenies<sup>6-8</sup> - <https://vertlife.org> and <https://birdtree.org>.

## **Acknowledgements**

We thank the teams behind the open-source databases we used for our study (Living Planet Team, GBIF, BirdLife, PanTHERIA, VertLife and BirdTree. We are grateful to the WWF and the RZSL for compiling and maintaining the Living Planet Database, specifically Louise McRae and Robin Freeman, and to Dmitry Schigel and Jan Legind at GBIF for providing access to a direct download link for the occurrence data. We thank the Critical Thinking in Ecology and Environmental Sciences 2015-16 tutorial group at the University of Edinburgh including Hannah Louise Stevens, Ashlie Nithsdale, Lisa Kopsieker and Claudia Ardrey who helped us conceive the idea for the analysis. We thank Dan Greenberg for advice on state-space models and Kat Keogan and Albert Phillimore for advice on phylogenetic models. We thank Anne Magurran, Albert Phillimore and Mark Vellend for providing very helpful feedback on the manuscript. We

thank our reviewers for providing very constructive feedback improving our manuscript. Funding for this research was provided by the NERC doctoral training partnership grant (NE/L002558/1) at the University of Edinburgh and the Carnegie Trust for the Universities of Scotland.

#### **Author contributions**

GND and IMS conceived the idea and conducted the statistical analyses. JLG contributed to the calculation of geographic range estimates. All authors contributed to the integration of the LPI, GBIF and IUCN databases, which GND led. GND created all figures with input from IMS. GND wrote the first draft of the manuscript and all authors contributed to revisions. IMS supervised the research as a senior author.

#### **Competing interests**

The authors declare no competing interests.

#### **References**

1. Ehrlén, J. & Morris, W. F. Predicting changes in the distribution and abundance of species under environmental change. *Ecol. Lett.* **18**, 303–314 (2015).
2. Hefley, T. J., Hooten, M. B., Drake, J. M., Russell, R. E. & Walsh, D. P. When can the cause of a population decline be determined? *Ecol. Lett.* **19**, 1353–1362 (2016).
3. IPBES. Summary for policymakers of the regional assessment report on biodiversity and ecosystem services for Europe and Central Asia of the Intergovernmental Science-Policy Platform on Biodiversity and Ecosystem Services. M. Fischer, M. Rounsevell, A. Torre-Marín, Rando, A. Mader, A. Church, M. Elbakidze, V. Elias, T. Hahn, P.A. Harrison, J. Hauck, B. Martín-López, I. Ring, C. Sandström, I. Sousa

Pinto, P. Visconti and N.E Zimmermann (eds.). IPBES secretariat, Bonn, Germany.  
(2018).

4. Gilroy, J. J., Gill, J. A., Butchart, S. H. M., Jones, V. R. & Franco, A. M. A. Migratory diversity predicts population declines in birds. *Ecol. Lett.* **19**, 308–317 (2016).
5. Ceballos, G., Ehrlich, P. R. & Dirzo, R. Biological annihilation via the ongoing sixth mass extinction signaled by vertebrate population losses and declines. *Proc. Natl. Acad. Sci.* 201704949 (2017) doi:10.1073/pnas.1704949114.
6. Tonini, J. F. R., Beard, K. H., Ferreira, R. B., Jetz, W. & Pyron, R. A. Fully-sampled phylogenies of squamates reveal evolutionary patterns in threat status. *Biol. Conserv.* **204**, 23–31 (2016).
7. Jetz, W. & Pyron, R. A. The interplay of past diversification and evolutionary isolation with present imperilment across the amphibian tree of life. *Nat. Ecol. Evol.* (2018) doi:10.1038/s41559-018-0515-5.
8. Jetz, W., Thomas, G. H., Joy, J. B., Hartmann, K. & Mooers, A. O. The global diversity of birds in space and time. *Nature* **491**, 444–448 (2012).
9. Batt, R. D., Morley, J. W., Selden, R. L., Tingley, M. W. & Pinsky, M. L. Gradual changes in range size accompany long-term trends in species richness. *Ecol. Lett.* **20**, 1148–1157 (2017).
10. Oliver, T. H. *et al.* Biodiversity and Resilience of Ecosystem Functions. *Trends Ecol. Evol.* **30**, 673–684 (2015).
11. Hansen, M. C. *et al.* High-resolution global maps of 21st-century forest cover change. *Science* **342**, 850–853 (2013).

- 883 12. Bowler, D. *et al.* The geography of the Anthropocene differs between the land and  
884 the sea. (2018) doi:10.1101/432880.
- 885 13. Halpern, B. S. *et al.* Spatial and temporal changes in cumulative human impacts on  
886 the world's ocean. *Nat. Commun.* **6**, (2015).
- 887 14. Blowes, S. *et al.* Biodiversity trends are stronger in marine than terrestrial  
888 assemblages. (2018) doi:10.1101/457424.
- 889 15. Dornelas, M. *et al.* A balance of winners and losers in the Anthropocene. *Ecol. Lett.*  
890 **22**, 847–854 (2019).
- 891 16. Isaac, N. J. B. & Cowlshaw, G. How species respond to multiple extinction threats.  
892 *Proc. R. Soc. Lond. B Biol. Sci.* **271**, 1135–1141 (2004).
- 893 17. Khaliq, I., Hof, C., Prinzinger, R., Bohning-Gaese, K. & Pfenninger, M. Global  
894 variation in thermal tolerances and vulnerability of endotherms to climate change.  
895 *Proc. R. Soc. B Biol. Sci.* **281**, 20141097–20141097 (2014).
- 896 18. Morrison, L., Estrada, A. & Early, R. Species traits suggest European mammals  
897 facing the greatest climate change are also least able to colonize new locations.  
898 *Divers. Distrib.* **24**, 1321–1332 (2018).
- 899 19. Pigott, C. D. & Walters, S. M. The scientific basis of practical conservation: aims and  
900 methods of conservation. in *Proc. R. Soc. Lond. B* vol. 197 59–68 (The Royal  
901 Society, 1977).
- 902 20. Longton, R. E. & Hedderson, T. A. What are rare species and why conserve them?  
903 *Lindbergia* **25**, 53–61 (2000).

- 904 21. Gaston, K. & Fuller, R. Commonness, population depletion and conservation  
905 biology. *Trends Ecol. Evol.* **23**, 14–19 (2008).
- 906 22. Lande, R. Risks of population extinction from demographic and environmental  
907 stochasticity and random catastrophes. *Am. Nat.* **142**, 911–927 (1993).
- 908 23. Melbourne, B. A. & Hastings, A. Extinction risk depends strongly on factors  
909 contributing to stochasticity. *Nature* **454**, 100–103 (2008).
- 910 24. Kilpatrick, A. M. & Ives, A. R. Species interactions can explain Taylor’s power law for  
911 ecological time series. *Nature* **422**, 65–68 (2003).
- 912 25. Kareiva, P. Population dynamics in spatially complex environments: theory and data.  
913 *Phil Trans R Soc Lond B* **330**, 175–190 (1990).
- 914 26. Hanski, I. Metapopulation dynamics. *Nature* **396**, 41 (1998).
- 915 27. Dennis, B., Assas, L., Elaydi, S., Kwessi, E. & Livadiotis, G. Allee effects and  
916 resilience in stochastic populations. *Theor. Ecol.* **9**, 323–335 (2016).
- 917 28. Sun, G.-Q. Mathematical modeling of population dynamics with Allee effect.  
918 *Nonlinear Dyn.* **85**, 1–12 (2016).
- 919 29. Bowler, D. E., Heldbjerg, H., Fox, A. D., O’Hara, R. B. & Böhning-Gaese, K.  
920 Disentangling the effects of multiple environmental drivers on population changes  
921 within communities. *J. Anim. Ecol.* **87**, 1034–1045 (2018).
- 922 30. Harnik, P. G., Simpson, C. & Payne, J. L. Long-term differences in extinction risk  
923 among the seven forms of rarity. *Proc. R. Soc. B Biol. Sci.* **279**, 4969–4976 (2012).

- 924 31. Steffen, W., Crutzen, P. J. & McNeill, J. R. The Anthropocene: Are Humans Now  
925 Overwhelming the Great Forces of Nature. *AMBIO J. Hum. Environ.* **36**, 614–621  
926 (2007).
- 927 32. Maxwell, S. L., Fuller, R. A., Brooks, T. M. & Watson, J. E. Biodiversity: The ravages  
928 of guns, nets and bulldozers. *Nature* **536**, 143–145 (2016).
- 929 33. Martín-López, B., González, J. A. & Montes, C. The pitfall-trap of species  
930 conservation priority setting. *Biodivers. Conserv.* **20**, 663–682 (2011).
- 931 34. van Strien, A. J. *et al.* Modest recovery of biodiversity in a western European  
932 country: The Living Planet Index for the Netherlands. *Biol. Conserv.* **200**, 44–50  
933 (2016).
- 934 35. Mace, G. M. *et al.* Quantification of Extinction Risk: IUCN's System for Classifying  
935 Threatened Species. *Conserv. Biol.* **22**, 1424–1442 (2008).
- 936 36. Akçakaya, H. R. *et al.* Quantifying species recovery and conservation success to  
937 develop an IUCN Green List of Species: Species Recovery and Conservation  
938 Success. *Conserv. Biol.* **32**, 1128–1138 (2018).
- 939 37. Barlow, J. *et al.* Quantifying the biodiversity value of tropical primary, secondary, and  
940 plantation forests. *Proc. Natl. Acad. Sci.* **104**, 18555–18560 (2007).
- 941 38. Humbert, J.-Y., Scott Mills, L., Horne, J. S. & Dennis, B. A better way to estimate  
942 population trends. *Oikos* **118**, 1940–1946 (2009).
- 943 39. Leung, B., Greenberg, D. A. & Green, D. M. Trends in mean growth and stability in  
944 temperate vertebrate populations. *Divers. Distrib.* **23**, 1372–1380 (2017).

- 945 40. Fritz, S. A., Bininda-Emonds, O. R. P. & Purvis, A. Geographical variation in  
946 predictors of mammalian extinction risk: big is bad, but only in the tropics. *Ecol. Lett.*  
947 **12**, 538–549 (2009).
- 948 41. Brook, B. W., Traill, L. W. & Bradshaw, C. J. A. Minimum viable population sizes and  
949 global extinction risk are unrelated: MVP is unrelated to global extinction risk. *Ecol.*  
950 *Lett.* **9**, 375–382 (2006).
- 951 42. Pereira, H. M., Navarro, L. M. & Martins, I. S. Global Biodiversity Change: The Bad,  
952 the Good, and the Unknown. *Annu. Rev. Environ. Resour.* **37**, 25–50 (2012).
- 953 43. Daskalova, G. N. *et al.* Forest loss as a catalyst of population and biodiversity  
954 change: *Science, accepted* (preprint 2018) doi:10.1101/473645.
- 955 44. CBD. Strategic plan for biodiversity 2011–2020 and the Aichi targets. In Report of  
956 the Tenth Meeting of the Conference of the Parties to the Convention on Biological  
957 Diversity. (2010).
- 958 45. Purvis, A., Gittleman, J. L., Cowlishaw, G. & Mace, G. M. Predicting extinction risk in  
959 declining species. *Proc. R. Soc. B Biol. Sci.* **267**, 1947–1952 (2000).
- 960 46. Cardillo, M. *et al.* Human Population Density and Extinction Risk in the World's  
961 Carnivores. *PLoS Biol.* **2**, e197 (2004).
- 962 47. Pounds, A. J. *et al.* Widespread amphibian extinctions from epidemic disease driven  
963 by global warming. *Nature* **439**, 161–167 (2006).
- 964 48. Green, D. M. The ecology of extinction: population fluctuation and decline in  
965 amphibians. *Biol. Conserv.* **111**, 331–343 (2003).



- 966 49. Moller, A. P., Rubolini, D. & Lehikoinen, E. Populations of migratory bird species that  
967 did not show a phenological response to climate change are declining. *Proc. Natl.*  
968 *Acad. Sci.* **105**, 16195–16200 (2008).
- 969 50. Caughley, G. Directions in Conservation Biology. *J. Anim. Ecol.* **63**, 215 (1994).
- 970 51. Robbirt, K. M., Roberts, D. L. & Hawkins, J. A. Comparing IUCN and Probabilistic  
971 Assessments of Threat: Do IUCN Red List Criteria Conflate Rarity and Threat?  
972 *Biodivers. Conserv.* **15**, 1903–1912 (2006).
- 973 52. Harrison, S., Viers, J. H., Thorne, J. H. & Grace, J. B. Favorable environments and  
974 the persistence of naturally rare species. *Conserv. Lett.* **1**, 65–74 (2008).
- 975 53. Mihoub, J.-B. *et al.* Setting temporal baselines for biodiversity: the limits of available  
976 monitoring data for capturing the full impact of anthropogenic pressures. *Sci. Rep.* **7**,  
977 41591 (2017).
- 978 54. Vellend, M. *et al.* Extinction debt of forest plants persists for more than a century  
979 following habitat fragmentation. *Ecology* **87**, 542–548 (2006).
- 980 55. Fagan, W. F. & Holmes, E. E. Quantifying the extinction vortex. *Ecol. Lett.* **0**,  
981 051109031307004 (2005).
- 982 56. WWF. Living Planet Report - 2018: Aiming Higher. Grooten, M. and Almond,  
983 R.E.A.(Eds). WWF, Gland, Switzerland. (2018).
- 984 57. McRae, L., Freeman, R. & Marconi, V. 'The Living Planet Index' in: Living Planet  
985 Report 2016: Risk and resilience in a new era (ed. Oerlemans N). WWF  
986 International, Gland, Switzerland. (2016).

- 987 58. McRae, L. *et al.* The Living Planet Index in: Living Planet Report 2012 (ed. Almond  
988 R). WWF, Gland, Switzerland. (2012).
- 989 59. WWF. Living Planet Report 2018 Technical Supplement: Living Planet Index.  
990 (2018).
- 991 60. McRae, L., Deinet, S. & Freeman, R. The Diversity-Weighted Living Planet Index:  
992 Controlling for Taxonomic Bias in a Global Biodiversity Indicator. *PLOS ONE* **12**,  
993 e0169156 (2017).
- 994 61. Wauchope, H. S., Amano, T., Sutherland, W. J. & Johnston, A. When can we trust  
995 population trends? A method for quantifying the effects of sampling interval and  
996 duration. *Methods Ecol. Evol.* **10**, 2067–2078 (2019).
- 997 62. Fournier, A. M. V., White, E. R. & Heard, S. B. Site-selection bias can drive apparent  
998 population declines in long-term studies. doi:10.7287/peerj.preprints.27507v1.
- 999 63. Didham, R. K. *et al.* Interpreting insect declines: seven challenges and a way  
1000 forward. *Insect Conserv. Divers.* **13**, 103–114 (2020).
- 1001 64. Davidson, A. D. *et al.* Geography of current and future global mammal extinction  
1002 risk. *PLOS ONE* **12**, e0186934 (2017).
- 1003 65. Spooner, F. E. B., Pearson, R. G. & Freeman, R. Rapid warming is associated with  
1004 population decline among terrestrial birds and mammals globally. *Glob. Change*  
1005 *Biol.* (2018) doi:10.1111/gcb.14361.
- 1006 66. Keogan, K. *et al.* Global phenological insensitivity to shifting ocean temperatures  
1007 among seabirds. *Nat. Clim. Change* **8**, 313–318 (2018).

1008 67. Dunic, J. C. *et al.* Attributing the variability in direction and magnitude of local-scale  
1009 marine biodiversity change to human activities. *bioRxiv* (2017) doi:10.1101/162362.

1010 68. D. Vinebrooke, R. *et al.* Impacts of multiple stressors on biodiversity and ecosystem  
1011 functioning: the role of species co-tolerance. *Oikos* **104**, 451–457 (2004).

1012 69. R Core Team. R: A language and environment for statistical computing. R  
1013 Foundation for Statistical Computing, Vienna, Austria. (2017).

1014 70. LPI. Living Planet Index database, 2016. [www.livingplanetindex.org/](http://www.livingplanetindex.org/) Downloaded  
1015 February 2016. (2016).

1016 71. van de Pol, M. & Wright, J. A simple method for distinguishing within- versus  
1017 between-subject effects using mixed models. *Anim. Behav.* **77**, 753–758 (2009).

1018 72. Foley, N. M., Springer, M. S. & Teeling, E. C. Mammal madness: is the mammal tree  
1019 of life not yet resolved? *Philos. Trans. R. Soc. B Biol. Sci.* **371**, 20150140 (2016).

1020 73. Tarver, J. E. *et al.* The Interrelationships of Placental Mammals and the Limits of  
1021 Phylogenetic Inference. *Genome Biol. Evol.* **8**, 330–344 (2016).

1022 74. Rabinowitz, D. Seven forms of rarity. in *The biological aspects of rare plants*  
1023 *conservation* (Ed. H Synge) 205–217 (1981).

1024 75. GBIF. Biodiversity occurrence data. <http://www.gbif.org/> Downloaded Feb 2016 - Apr  
1025 2017. (2017).

1026 76. BirdLife International. IUCN Red List for birds. Downloaded from  
1027 <http://www.birdlife.org> in March 2018. (2018).

1028 77. IUCN. The IUCN Red List of Threatened Species. Version 2017-3. (2017).

- 1029 78. Dennis, B., Ponciano, J. M., Lele, S. R., Taper, M. L. & Staples, D. F. Estimating  
1030 density dependence, process noise, and observation error. *Ecol. Monogr.* **76**, 323–  
1031 341 (2006).
- 1032 79. Knappe, J., Jonzén, N. & Sköld, M. On observation distributions for state space  
1033 models of population survey data: Observation models for population data. *J. Anim.*  
1034 *Ecol.* **80**, 1269–1277 (2011).
- 1035 80. Pedersen, M. W., Berg, C. W., Thygesen, U. H., Nielsen, A. & Madsen, H.  
1036 Estimation methods for nonlinear state-space models in ecology. *Ecol. Model.* **222**,  
1037 1394–1400 (2011).
- 1038 81. Rueda-Cediel, P., Anderson, K. E., Regan, T. J. & Regan, H. M. Effects of  
1039 uncertainty and variability on population declines and IUCN Red List classifications.  
1040 *Conserv. Biol.* (2018) doi:10.1111/cobi.13081.
- 1041 82. Jones, K. E. *et al.* PanTHERIA: a species-level database of life history, ecology, and  
1042 geography of extant and recently extinct mammals: *Ecological Archives* E090-184.  
1043 *Ecology* **90**, 2648–2648 (2009).
- 1044 83. Phillips, H. R. P., Newbold, T. & Purvis, A. Land-use effects on local biodiversity in  
1045 tropical forests vary between continents. *Biodivers. Conserv.* **26**, 2251–2270 (2017).
- 1046 84. Zizka, A. *et al.* CoordinateCleaner: Standardized cleaning of occurrence records  
1047 from biological collection databases. *Methods Ecol. Evol.* (2019) doi:10.1111/2041-  
1048 210X.13152.
- 1049 85. Hijmans, R. J. geosphere: Spherical Trigonometry. R package version 1.5-5.  
1050 <https://CRAN.R-project.org/package=geosphere>. (2016).

1051 86. Chamberlain, S. rredlist: 'IUCN' Red List Client. R package version 0.4.0.  
 1052 <https://CRAN.R-project.org/package=rredlist>. (2017).

1053 87. Hadfield, J. D. MCMC Methods for Multi-Response Generalized Linear Mixed  
 1054 Models: The MCMCglmm R Package. *J. Stat. Softw.* **33**, 1–22 (2010).

1055 88. Olson, D. M. & Dinerstein, E. The Global 200: Priority Ecoregions for Global  
 1056 Conservation. *Ann. Mo. Bot. Gard.* **89**, 199 (2002).

1057 89. Newbold, T. *et al.* Widespread winners and narrow-ranged losers: Land use  
 1058 homogenizes biodiversity in local assemblages worldwide. *PLOS Biol.* **16**, e2006841  
 1059 (2018).

1060 90. USGS. North American Breeding Bird Survey.  
 1061 [https://www.usgs.gov/centers/pwrc/science/north-american-breeding-bird-survey?qt-](https://www.usgs.gov/centers/pwrc/science/north-american-breeding-bird-survey?qt-science_center_objects=0#qt-science_center_objects)  
 1062 [science\\_center\\_objects=0#qt-science\\_center\\_objects](https://www.usgs.gov/centers/pwrc/science/north-american-breeding-bird-survey?qt-science_center_objects=0#qt-science_center_objects).

1063 91. Nolet, B. A. & Baveco, J. M. Development and viability of a translocated beaver  
 1064 *Castor fiber* population in The Netherlands. *Biol. Conserv.* **75**, 125–137 (1996).

1065 92. Magurran, A. E. & Henderson, P. A. Explaining the excess of rare species in natural  
 1066 species abundance distributions. *Nature* **422**, 714 (2003).

1067 93. Daskalova, G.N. gndaskalova/PopChangeRarity: v1.0 (Version v1.0). *Zenodo* (2020)  
 1068 doi:<http://doi.org/10.5281/zenodo.3817208>.  
 1069
